# Supplementary material for: Cellulose-Based Light-Management Films with Improved Properties Directly Fabricated from Green Tea
Source: MDPI journal article supplement (doi:10.3390/polysaccharides3040045), 2022-12-02
Supplement: s1 [file s1]

## Supplementary Information

Cellulose-based light management films with improved properties  
directly fabricated from green tea

Jianfeng Peng<sup>1,a</sup>, Xiaoqian Ji<sup>1,a</sup>, Xinqun Xia<sup>1</sup>, Cuiyue Li<sup>a</sup>, Zhaoning Wei<sup>1</sup>, Chen Chu<sup>1</sup>,  
Zhen Xu<sup>1</sup>, Jun Zhang<sup>2</sup>, Guangmei Xia<sup>1\*</sup>

<sup>1</sup> State Key Laboratory of Biobased Material and Green Papermaking, Faculty of  
Light Industry, Qilu University of Technology (Shandong Academy of Sciences),  
Jinan 250353, Shandong , China

<sup>2</sup> Beijing National Laboratory for Molecular Sciences, CAS Key Laboratory of  
Engineering Plastics, Institute of Chemistry, Chinese Academy of Sciences (CAS),  
Beijing, 100190, China

\*Corresponding authors: gmxia@qlu.edu.cn (Guangmei Xia);

<sup>a</sup> The first two authors contribute equally to this work.

Table S1. The mass content of WPs in the green tea-based all-biomass light  
management composite films.

| Sample | Content of WPs<br>(%) |
|--------|-----------------------|
| WPT0   | 0                     |
| WPT10  | 10                    |
| WPT20  | 20                    |
| WPT30  | 30                    |
| WPT40  | 40                    |
| WPT50  | 50                    |

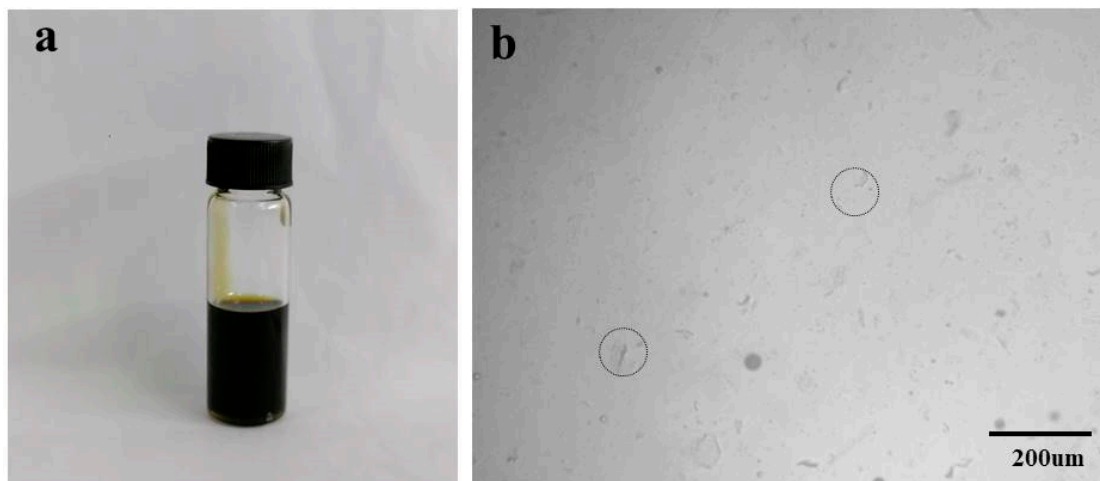

Figure S1. Digital picture (a) and POM micrograph (b) of green tea/AmimCl solution mixtures at 80 °C after 4 hrs.

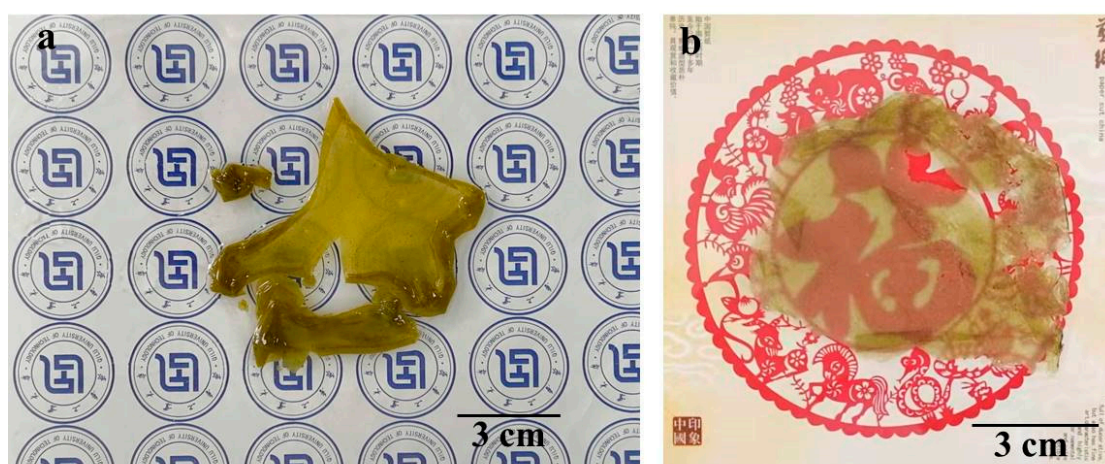

Figure S2. Optical photographs of hydrogels (a, Gel-WTP0) and film (b, WTP0) prepared directly from green tea.

Table S2. Light transmission values of WPs-film, WPT0, WPT10, WPT20, WPT30, WPT40 and WPT50.

| Samples  | Light transmission (%) |            |            |            |            |            |            |
|----------|------------------------|------------|------------|------------|------------|------------|------------|
|          | 200 nm                 | 300 nm     | 400 nm     | 500 nm     | 600 nm     | 700 nm     | 800 nm     |
| WPs-film | 20.16±0.18             | 75.79±0.15 | 88.06±0.17 | 90.34±0.18 | 91.02±0.14 | 91.32±0.11 | 91.49±0.12 |
| WPT0     | 0.37±0.01              | 2.37±0.02  | 10.25±0.05 | 54.78±0.09 | 67.65±0.07 | 68.60±0.09 | 86.66±0.12 |
| WPT10    | 0.20±0.01              | 3.85±0.04  | 14.17±0.06 | 60.63±0.08 | 71.10±0.06 | 72.60±0.08 | 86.56±0.11 |
| WPT20    | 0.49±0.03              | 5.26±0.05  | 24.05±0.05 | 63.09±0.07 | 71.18±0.06 | 72.63±0.08 | 83.95±0.10 |
| WPT30    | 0.38±0.02              | 6.36±0.03  | 25.87±0.07 | 67.64±0.07 | 74.73±0.04 | 76.62±0.07 | 86.79±0.09 |
| WPT40    | 0.44±0.02              | 5.57±0.02  | 28.96±0.06 | 69.86±0.08 | 77.13±0.07 | 79.91±0.09 | 87.39±0.08 |
| WPT50    | 0.38±0.03              | 9.74±0.01  | 45.41±0.07 | 73.24±0.07 | 78.29±0.08 | 80.28±0.11 | 85.57±0.09 |

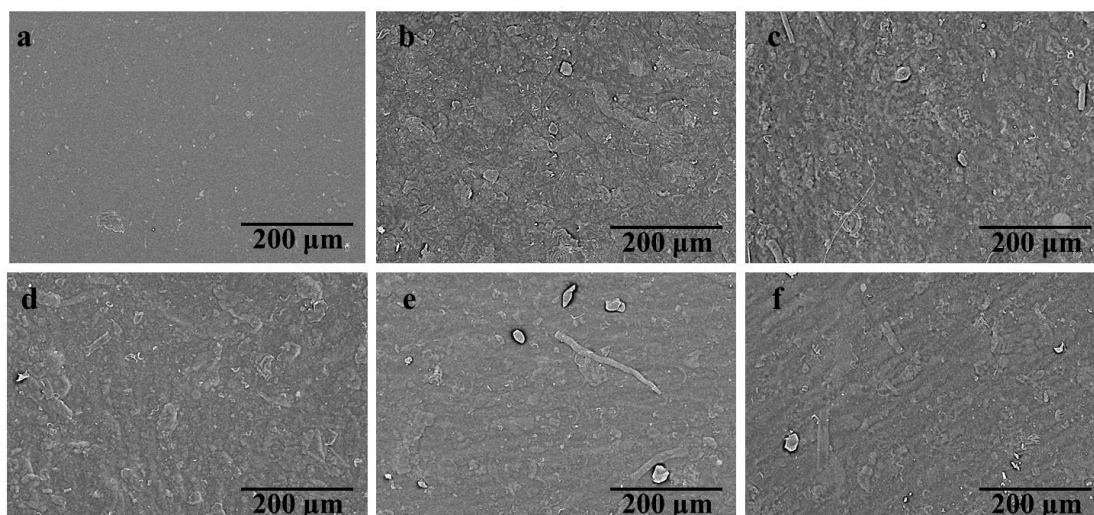

Figure S3. (a-f) The surfacial SEM micrographs of WPs-film, WPT10, WPT20, WPT30, WPT40 and WPT50.

Table. S3 The Thicknesses and Mechanical properties of WPT10, WPT20, WPT30, WPT40 and WPT50.

| Sample | Thickness ( $\mu\text{m}$ ) | Elongation (%)   | Strength (MPa)   |
|--------|-----------------------------|------------------|------------------|
| WPT10  | $21 \pm 0.7$                | $10.89 \pm 1.38$ | $5.91 \pm 0.95$  |
| WPT20  | $20 \pm 0.9$                | $13.50 \pm 1.79$ | $10.91 \pm 0.87$ |
| WPT30  | $21 \pm 0.8$                | $14.10 \pm 2.03$ | $26.18 \pm 1.02$ |
| WPT40  | $20 \pm 0.5$                | $14.90 \pm 1.56$ | $29.90 \pm 0.98$ |
| WPT50  | $20 \pm 0.4$                | $16.70 \pm 1.37$ | $35.92 \pm 0.76$ |

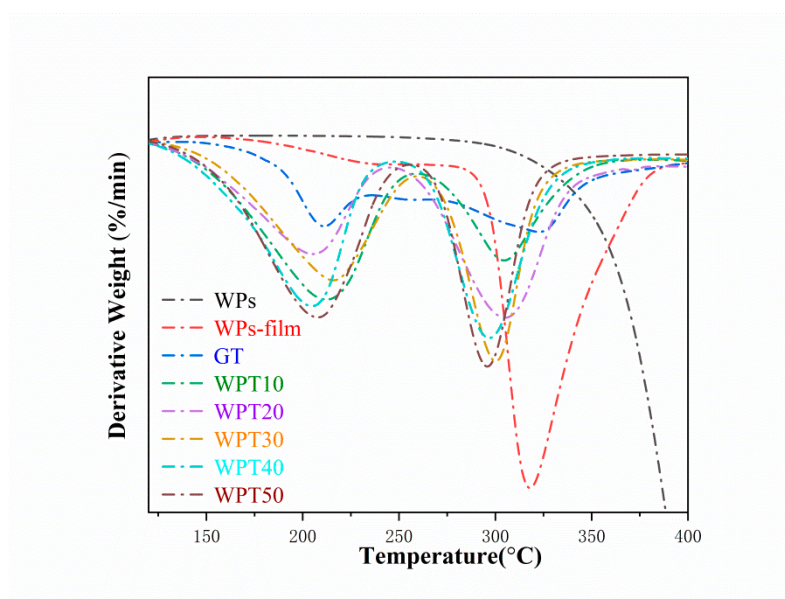

Figure S4. Differential thermogram curves (DTG) of WPs-film, WPT10, WPT20, WPT30, WPT40 and WPT50.
